# Supplementary material for: Enhancement of charge transfer between graphene and donor–π-acceptor molecule for ultrahigh sensing performance
Source: Royal Society of Chemistry journal article supplement (doi:10.1039/c7nr04209d), 2017-01-01
Supplement: c7nr04209d1.pdf [file c7nr04209d1.pdf]

## Supporting Information

# Enhancement of Charge Transfer between Graphene and Donor- $\pi$ -Acceptor Molecule for Ultrahigh Sensing Performance

Wenle Pei,<sup>a</sup> Tingting Zhang,<sup>b</sup> Yao Wang,<sup>a,d\*</sup> Zhuo Chen,<sup>a</sup> Ahmad Umar,<sup>c</sup> Hao Li,<sup>d</sup> Wei Guo<sup>b,\*</sup>

<sup>a</sup>Key Laboratory of Bio-Inspired Smart Interfacial Science and Technology of Ministry of Education, School of Chemistry and Environment, Beihang University, Beijing 100191, P. R. China.

<sup>b</sup>School of Physics, Beijing Institute of Technology, Beijing 100081, P. R. China.

<sup>c</sup>Department of Chemistry, Faculty of Science and Arts and Promising Centre for Sensors and Electronic Devices, Najran University, Najran 11001, Kingdom of Saudi Arabia.

<sup>d</sup>Institute of Electronic Paper Display, South China Academy of Advanced Optoelectronics, South China Normal University, Guang Zhou, 510006, P.R. China.

\*Address correspondence to [yao@buaa.edu.cn](mailto:yao@buaa.edu.cn) and [weigu07@bit.edu.cn](mailto:weigu07@bit.edu.cn).

**Table S1.** The Raman shift, Peak intensity, Intensity ratio ( $I_D/I_G$ ) of the ANS-rGO, rGO, GO.

| Sample  | Raman shift (cm <sup>-1</sup> ) |        | Peak intensity |        | Intensity ratio |
|---------|---------------------------------|--------|----------------|--------|-----------------|
|         | Peak D                          | Peak G | Peak D         | Peak G | ( $I_D/I_G$ )   |
| ANS-rGO | 1325                            | 1588   | 275            | 202    | 1.36            |
| rGO     | 1331                            | 1588   | 1399           | 1047   | 1.34            |
| GO      | 1331                            | 1593   | 2021           | 1814   | 1.11            |

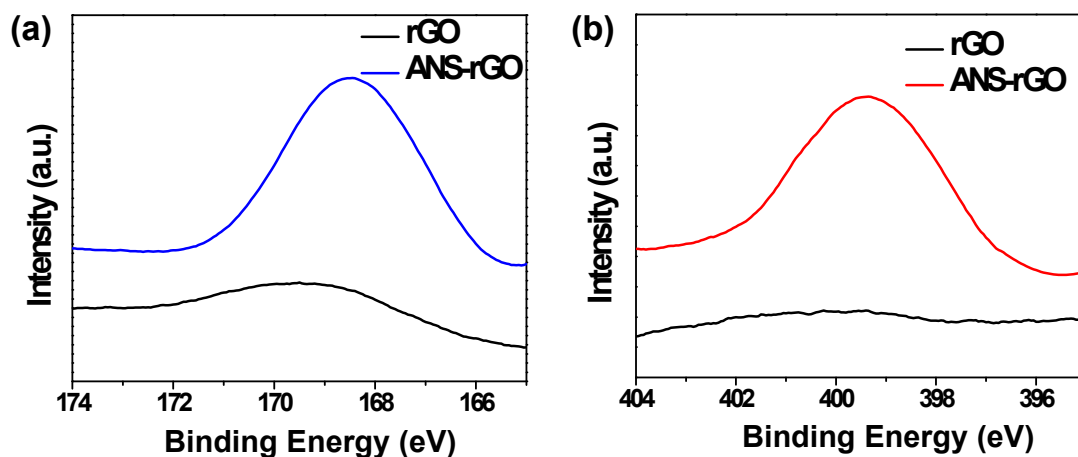

**Fig. S1** Typical XPS survey scan spectra (a) of S and (d) N of rGO and ANS-rGO materials.

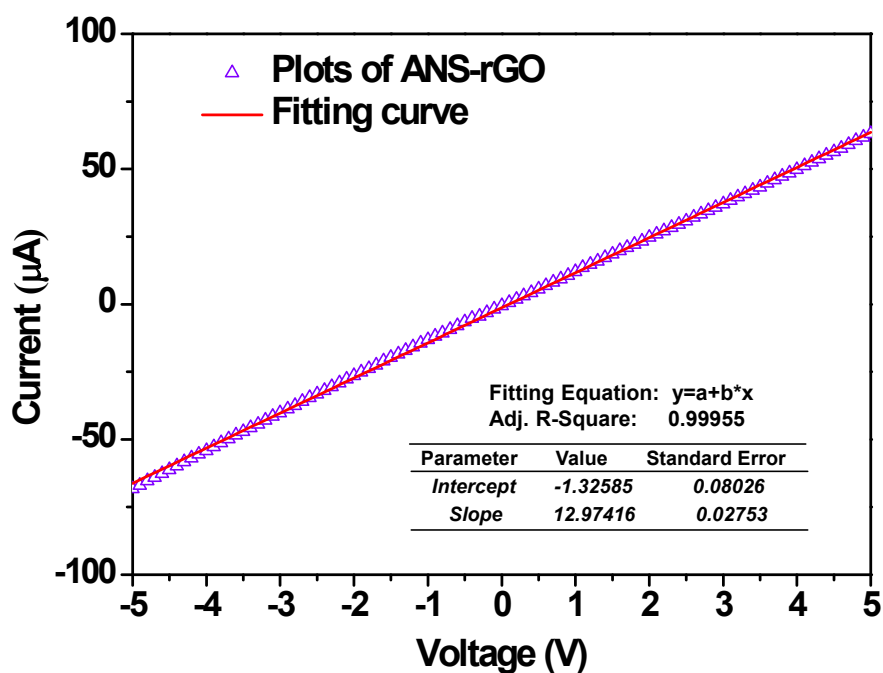

**Fig. S2** Current versus voltage curves of ANS-rGO sensor. The results indicated that the Schottky barriers were absent between ANS-rGO and IDEs, which ensures the accuracy of the gas sensing measurement in our work.

**Table S2.** The adsorption energy of the NA molecules or ANS molecules adsorbed on graphene via AA or AB stacking.

| Stacking | NA-graphene  | ANS-graphene |
|----------|--------------|--------------|
| EAA      | -686.1246 eV | -695.5830 eV |
| EAB      | -686.1823 eV | -696.6350 eV |
| EAB-AA   | -0.057.7eV   | -1.052eV     |

Table S2 shows that the adsorption energy of NA molecules and ANS molecules on graphene with AB stacking are 0.057.7eV and 1.052eV lower than AA stacking respectively.

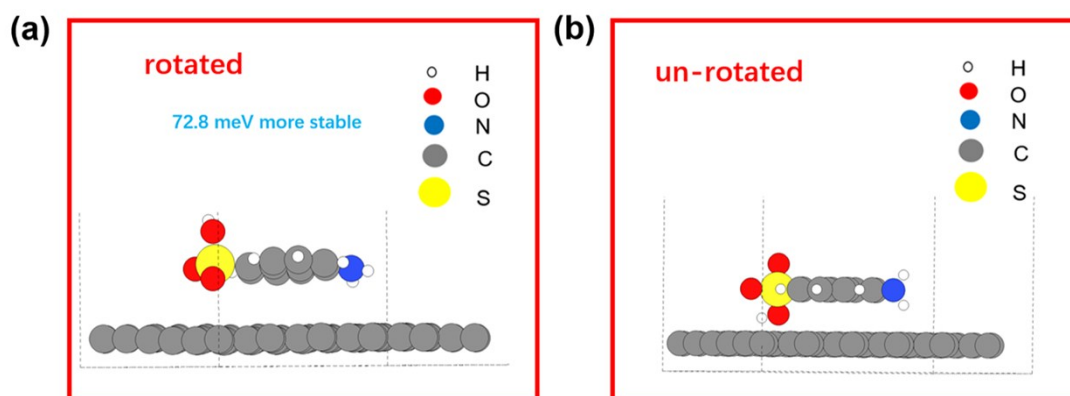

**Fig. S3** The rotated ANS and un-rotated ANS molecules adsorbed on graphene in (a) and (b), respectively. White, red, blue, gray, and yellow spheres donate the H, O, N, C, S atoms, respectively.

The charge density difference plot is defined as the difference between the charge density before and after bonding. From the calculation and analysis of the charge density difference plot, it is clear that the charge transfer and charge density redistribution happen during the bonding process.

As shown in Fig. S3, the adsorption energy of the rotated ANS molecules on the graphene surface is 72.8 meV stronger than the un-rotated one, thus, the rotated configuration with AB stacking has higher stability.

In order to confirm the electrons migration from the  $\text{-NH}_2$  to  $\text{-SO}_3\text{H}$  in the ANS molecule, we calculate the charge density difference based on the following formula

(Fig. S4).

$$\Delta\rho = (\rho_A + \rho_B) - (\rho_C + \rho_D + \rho_E)$$

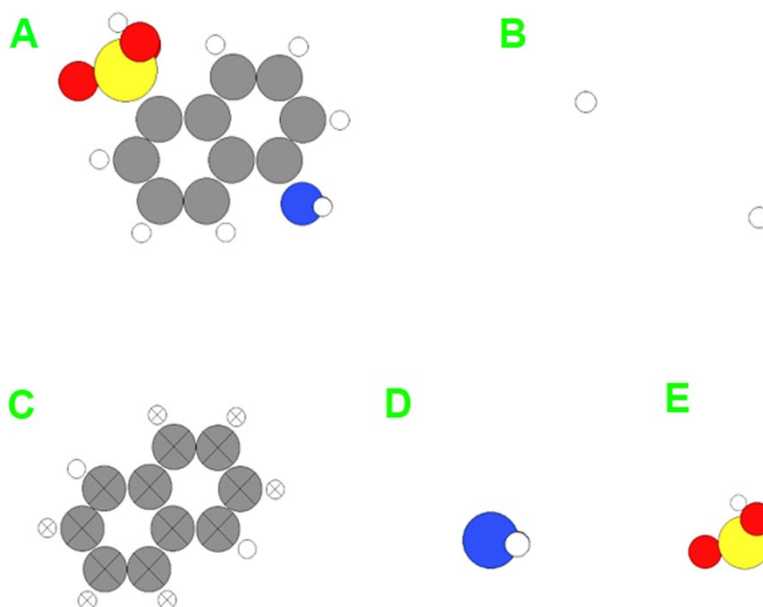

**Fig. S4** Molecular structures of -NH<sub>2</sub>, -SO<sub>3</sub>H and ANS. The charge density difference is calculated by the formula shown above, where A is the ANS molecule. B, C, D and E are isolated hydrogen atoms, naphthalene molecule, isolated NH<sub>2</sub>, isolated SO<sub>3</sub>H group, respectively. Gray, white, yellow, red and blue spheres denote carbon, hydrogen, oxygen, sulfur and nitrogen atoms, respectively.

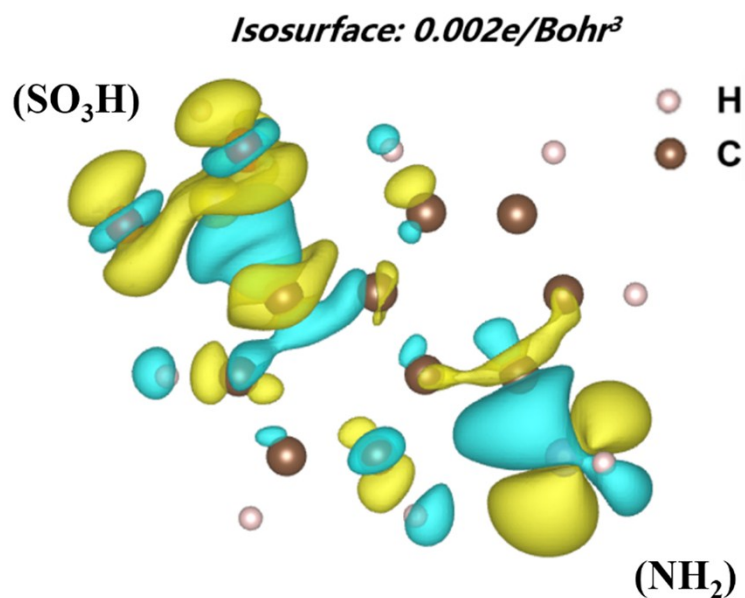

**Fig. S5** The charge density difference plot of ANS at charge density isosurface 0.002e/Bohr<sup>3</sup>. Brown sphere denotes carbon atom and white sphere denotes hydrogen atom. Yellow region indicates electron accumulation, and light blue region stand for electron deficiency.

In addition, From Fig. S5, it is intuitively demonstrated that the -NH<sub>2</sub> group donates a small amount of electron to the conjugated benzene rings, and the conjugated benzene rings donate a small amount of electron to the -SO<sub>3</sub>H group. The  $\pi$ -bridge facilitates the electron migration from the -NH<sub>2</sub> to -SO<sub>3</sub>H, significantly.

$$\Delta\rho = (\rho_A + \rho_B) - (\rho_C + \rho_D)$$

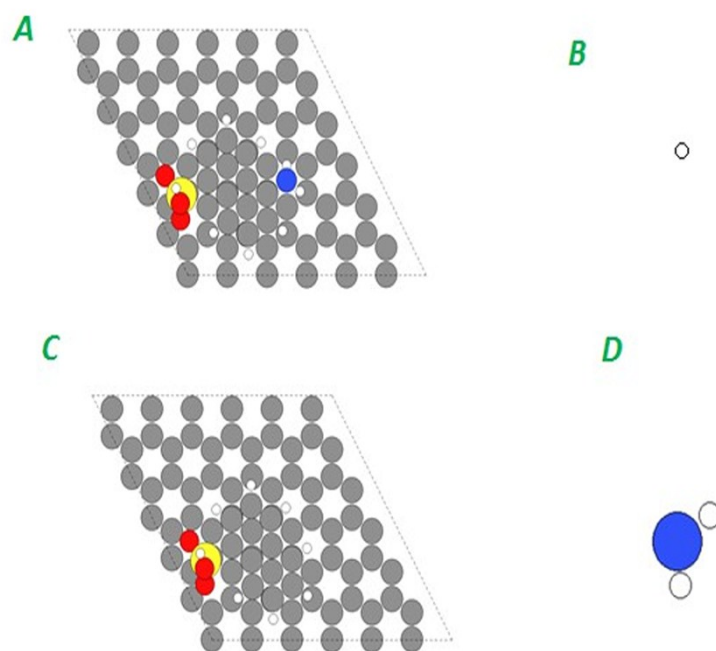

**Fig. S6** Molecular structures of ANS on graphene. The charge density difference is calculated by the formula shown in the figure, where A is the ANS molecule on graphene. B, C and D are isolated hydrogen atoms, naphthalene sulfonic acid on graphene and isolated  $\text{NH}_2$ , respectively. Gray, white, yellow, red and blue spheres denote carbon, hydrogen, oxygen, sulfur and nitrogen atoms, respectively.

The detailed charge density difference calculation of the supramolecular assembled ANS-rGO was performed in Fig. S6, highlighting the charge density redistribution caused by  $-\text{NH}_2$  group in ANS molecule and in between ANS and graphene.

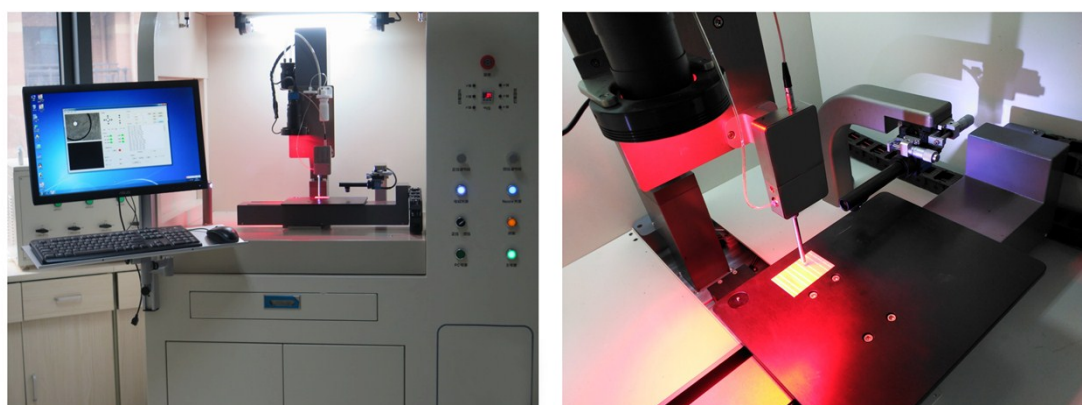

**Fig. S7** The metal-jetting system and process of jetting Ag-Pd paste on ceramic plates.

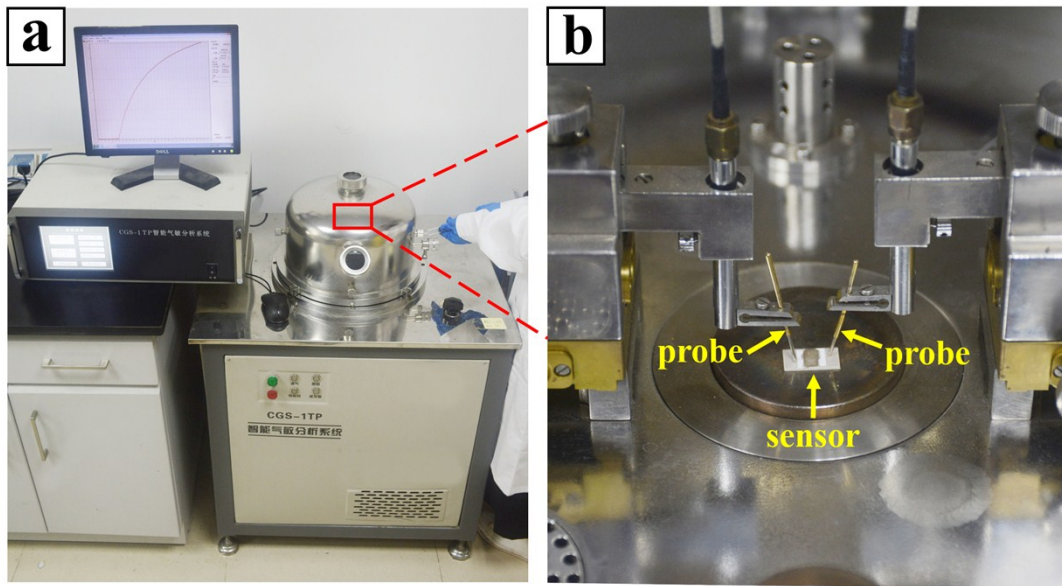

**Fig. S8** (a) Experimental set up for gas sensing measurement and an ideal  $\text{NO}_2$  gas was injected to gas chamber exhibiting sensor signals. (b)The image of test platform of inside gas chamber.
